# Supplementary material for: Rhizodeposition efficiency of pearl millet genotypes assessed on a short growing period by carbon isotopes ( δ 13 C and F 14 C)
Source: Copernicus journal article supplement (doi:10.5194/soil-8-49-2022), 2022-01-20
Supplement: Supplementary file 1 [file soil-8-49-2022-supplement.zip]

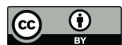

*Supplement of*

**Rhizodeposition efficiency of pearl millet genotypes assessed on a short growing period by carbon isotopes ( $\delta^{13}\text{C}$  and  $\text{F}^{14}\text{C}$ )**

**Papa Mamadou Sitor Ndour et al.**

*Correspondence to:* Papa Mamadou Sitor Ndour (sitndour@yahoo.fr)

- soil-8-49-2022-supplement-title-page.pdf
- Supplementary file.xlsx

The copyright of individual parts of the supplement might differ from the article licence.
